# Supplementary material for: Morphine-induced hyperalgesia involves mu opioid receptors and the metabolite morphine-3-glucuronide
Source: PubMed Central journal article supplement (PMC5583172; doi:10.1038/s41598-017-11120-4), 2017-09-04
Supplement: 41598_2017_11120_MOESM1_ESM.pdf [file 41598_2017_11120_MOESM1_ESM.pdf]

## **Supplementary Figures and Tables**

### **Morphine-induced hyperalgesia involves mu opioid receptor and the metabolite morphine-3-glucuronide**

Laurie-Anne Roeckel, Valérie Utard, David Reiss, Jinane Mouheiche, Hervé Maurin, Anne Robé, Emilie Audouard, John N. Wood, Yannick Goumon, Frédéric Simonin and Claire Gaveriaux-Ruff

**Table S1. Comparison of M3G and other MOR agonists in MOR-radioligand binding and signaling assays**

| Compound | [ <sup>3</sup> H]-<br>diprenorphine<br>binding to hMOR<br>in HEK293 cells | [ <sup>3</sup> H]-DAMGO<br>binding to WT<br>mouse brain<br>membranes | [ <sup>35</sup> S]-GTPγS binding to WT<br>mouse brain membranes | Inhibition of<br>cAMP<br>production in<br>hMOR HEK293<br>cells | Beta-arrestin-2 recruitment<br>in hMOR HEK293 cells |                       |                      |
|----------|---------------------------------------------------------------------------|----------------------------------------------------------------------|-----------------------------------------------------------------|----------------------------------------------------------------|-----------------------------------------------------|-----------------------|----------------------|
|          | Ki, nM                                                                    | Ki, nM                                                               | EC <sub>50</sub> , nM                                           | CTOP IC <sub>50</sub> ,<br>nM                                  | EC <sub>50</sub> , nM                               | EC <sub>50</sub> , nM | % of DAMGO<br>effect |
| DAMGO    | 9.6 ± 0.1                                                                 | 3.1 ± 0.4                                                            | 265 ± 82                                                        | 3140 ± 1202                                                    | 62 ± 10                                             | 198 ± 6               | 100                  |
| Fentanyl | 8.6 ± 0.8                                                                 | 5.8 ± 1.0                                                            | ND                                                              | ND                                                             | 40 ± 10                                             | 127 ± 31              | 84                   |
| Morphine | 14 ± 7                                                                    | 7.7 ± 0.9                                                            | 415 ± 208                                                       | 3705 ± 1372                                                    | 422 ± 196                                           | 2722 ± 557            | 37                   |
| M3G      | 1272 ± 166                                                                | 1403 ± 91                                                            | 14,299 ± 3276                                                   | 133 ± 23                                                       | > 40,000                                            | Und                   | Und                  |

ND, not determined ; Und, undetectable

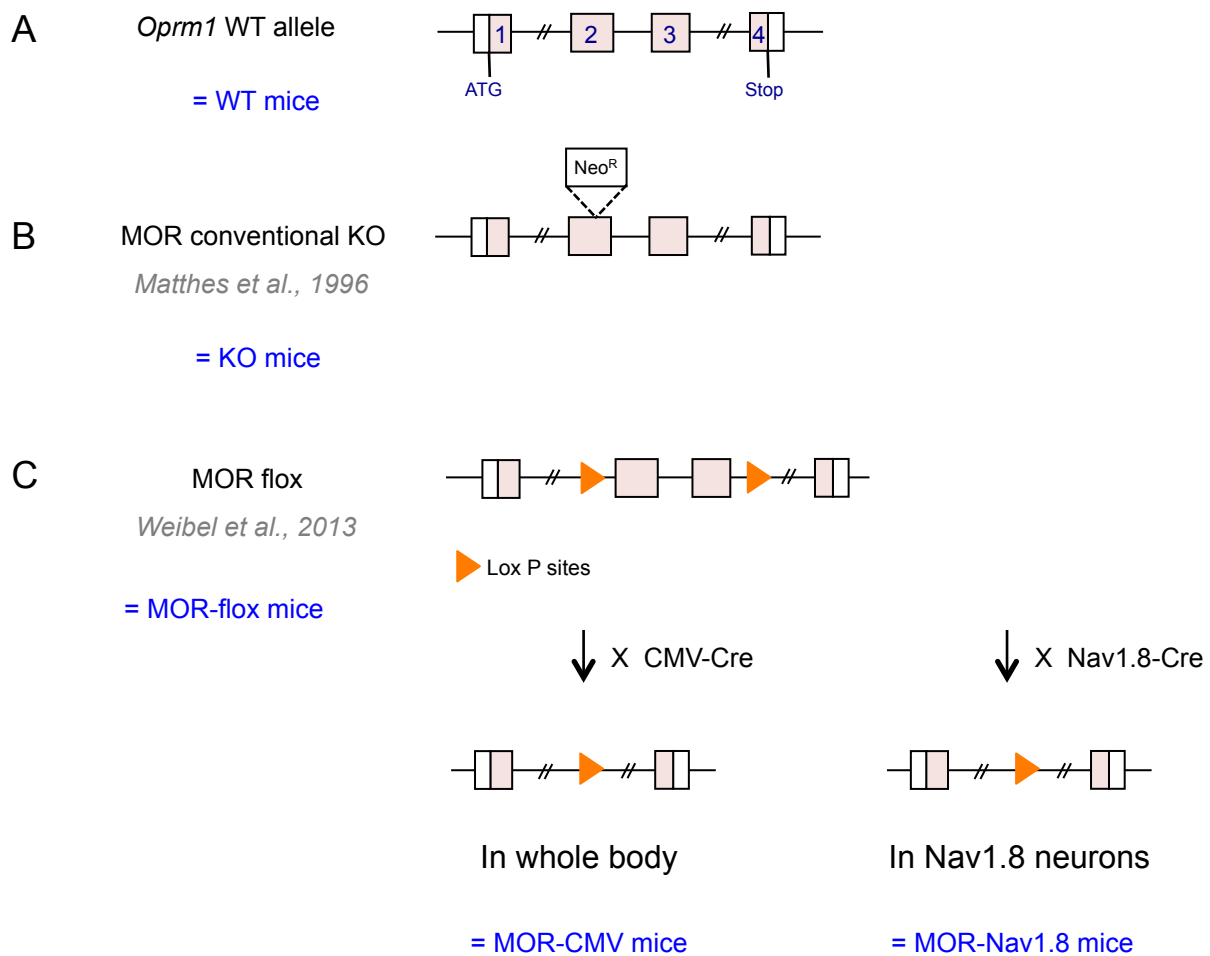

**Supplementary Figure S1. The different MOR mutant mouse lines used in the study.** (A) *Oprm1* gene WT allele. (B) For generating MOR conventional KO mice, a neomycin resistance cassette ( $\text{Neo}^R$ ) had been inserted in exon 2, causing the receptor gene inactivation. (C) Crossing of mice harboring floxed exons 2-3 with mice expressing the cyclic recombination enzyme (Cre) DNA under the Cytomegalovirus (CMV) promoter control led to ubiquitous MOR gene KO. Crossing with Nav1.8-Cre mice led to *Oprm1* gene inactivation in peripheral Nav1.8 neurons. The abbreviations used throughout the text and figures are written in blue characters. CMV, cytomegalovirus ubiquitous promoter; KO, knockout; MOR, mu opioid receptor; *Oprm1*, gene encoding MOR.

## A Experimental design

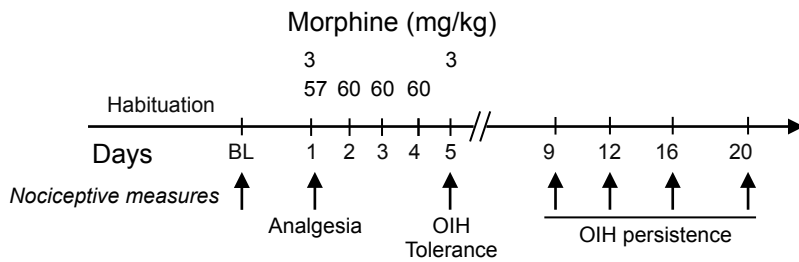

## B Analgesic tolerance

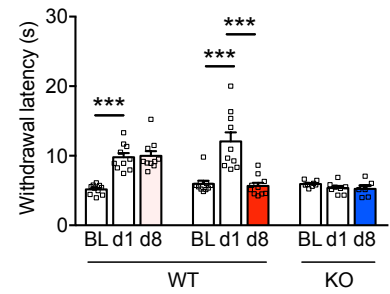

## C

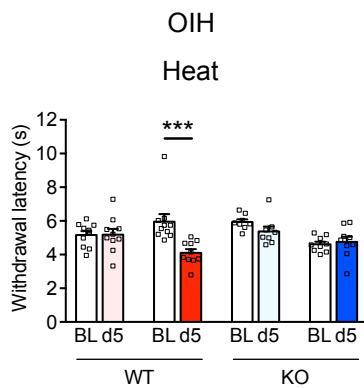

## D

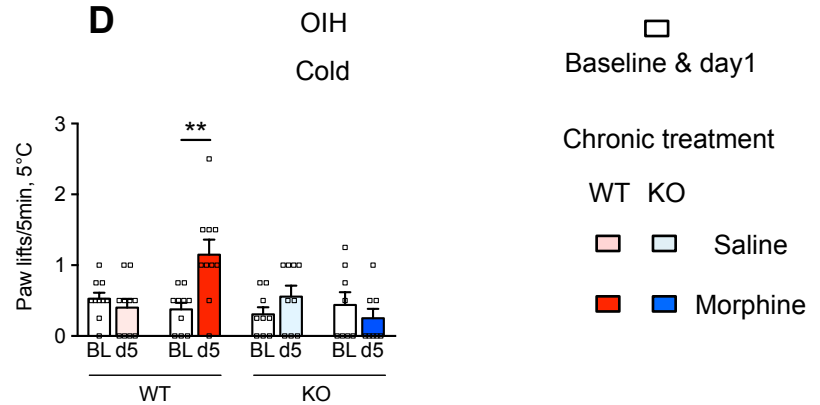

**Supplementary Figure S2. Morphine induced hyperalgesia in WT but not MOR KO mice following a repeated 4 day 60mg/kg treatment.** Analgesia, analgesic tolerance and OIH were measured following the protocol described in (A). (B) Analgesia and analgesic tolerance in the 48°C tail immersion test. (C) Heat hyperalgesia in the same test. (D) Cold allodynia measured with the 5°C cold plate test. \*\*, \*\*\*  $p < 0.01$ ,  $p < 0.001$  compared to the corresponding group (ANOVA repeated measures, Newman-Keuls). BL, Baseline. Data are expressed as mean  $\pm$ SEM.  $n = 7-10$  mice/group. Detailed statistical analyses are presented in Supplementary Table S7.

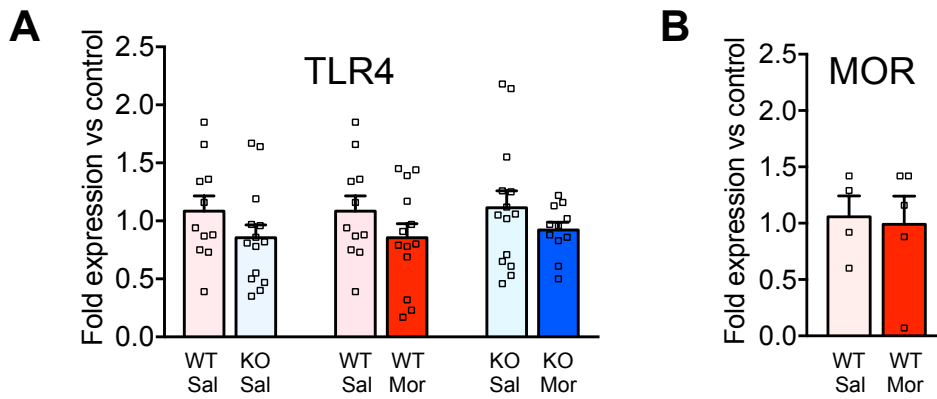

**Supplementary Figure S3. There is no difference for TLR4 transcript expression in KO mice and WT mice.** Mice were treated with repeated morphine (60 mg/kg, 4 days; Mor) or a saline control (Sal) solution following the protocol described in Supplementary figure S2. RNA was extracted from spinal cord, and TLR4 and MOR transcripts quantified by RT-qPCR. **(A)** MOR KO or morphine induced no change in TLR4 mRNA expression. **(B)** Repeated morphine did not change MOR expression as compared to saline controls. Data are expressed as mean  $\pm$ SEM.  $n = 4-10$  mice per group. One-way ANOVA. Detailed statistical analyses are presented in Supplementary Table S8.

**Supplementary Table S2. Detailed statistical evaluation for Fig. 1.**

One-way ANOVA repeated measures for analgesia and tolerance to analgesia

| WT               | Pressure                 |
|------------------|--------------------------|
| Treatment        | F(1,35)=29.751, p<0.001  |
| Time             | F(2,70)=124.521, p<0.001 |
| Time x Treatment | F(2,70)=8.216, p<0.001   |

| KO               | Pressure             |
|------------------|----------------------|
| Treatment        | F(1,35)=0.64, p=0.42 |
| Time             | F(2,70)=0.38, p=0.53 |
| Time x Treatment | F(2,70)=0.80, p=0.37 |

| WT               | Heat                     |
|------------------|--------------------------|
| Treatment        | F(1,46)=19.053, p<0.001  |
| Time             | F(2,88)=108.213, p<0.001 |
| Time x Treatment | F(2,88)=5.186, p<0.001   |

| KO               | Heat                  |
|------------------|-----------------------|
| Treatment        | F(1,39)=0.76, p=0.38  |
| Time             | F(2,78)=1.457, p=0.23 |
| Time x Treatment | F(2,78)=2.098, p=0.12 |

| MOR-flox         | Heat                    |
|------------------|-------------------------|
| Treatment        | F(1,16)=13.99, p<0.001  |
| Time             | F(2,32)=23.301, p<0.001 |
| Time x Treatment | F(2,32)=7.785, p<0.01   |

| CMV-KO           | Heat                  |
|------------------|-----------------------|
| Treatment        | F(1,15)=0.44, p=0.51  |
| Time             | F(2,30)=0.046, p=0.83 |
| Time x Treatment | F(2,30)=1.477, p=0.24 |

Two-way repeated measures ANOVA for hyperalgesia

| WT vs KO             | Mechanical               |
|----------------------|--------------------------|
| Genotype             | F(1, 66)=139.98, p<0.001 |
| Treatment            | F(1, 66)=16.17, p<0.001  |
| Genotype x Treatment | F(1, 66)=13.34, p<0.001  |
| Time                 | F(2,132)=149.55, p<0.001 |
| Time x Genotype      | F(2,132)=160.37, p<0.001 |

|                             |                       |
|-----------------------------|-----------------------|
| Time x Treatment            | F(2,132)=3.29, p<0.05 |
| Time x Genotype x Treatment | F(2,132)=2.12, p=0.12 |

|                             |                         |
|-----------------------------|-------------------------|
| WT vs KO                    | Heat                    |
| Genotype                    | F(1, 85)=0.36, p= 0.54  |
| Treatment                   | F(1, 85)=12.18, p<0.001 |
| Genotype x Treatment        | F(1, 85)=4.69, p<0.05   |
| Time                        | F(1, 85)=45.262, p<0.01 |
| Time x Genotype             | F(1, 85)=20.104, p<0.01 |
| Time x Treatment            | F(1, 85)=2.460, p=0.12  |
| Time x Genotype x Treatment | F(1, 85)=4.652, p<0.05  |

|                             |                          |
|-----------------------------|--------------------------|
| MOR-flox vs MOR-CMV KO      | Heat                     |
| Genotype                    | F(1, 31)=1.43, p= 0.24   |
| Treatment                   | F(1, 31)=6.10, p<0.05    |
| Genotype x Treatment        | F(1, 31)=2.43, p=0.12    |
| Time                        | F(1, 31)=7.672, p<0.01   |
| Time x Genotype             | F(1, 31)=9.656, p<0.01   |
| Time x Treatment            | F(1, 31)=15.540, p<0.001 |
| Time x Genotype x Treatment | F(1, 31)=4.121, p=0.051  |

|                             |                          |
|-----------------------------|--------------------------|
| WT vs KO                    | Cold                     |
| Genotype                    | F(1, 53)=9.47, p<0.01    |
| Treatment                   | F(1, 53)=5.22, p<0.05    |
| Genotype x Treatment        | F(1, 53)=6.14, p<0.05    |
| Time                        | F(1, 53)=13.029, p<0.001 |
| Time x Genotype             | F(1, 53)=17.334, p<0.001 |
| Time x Treatment            | F(1, 53)=13.354, p<0.001 |
| Time x Genotype x Treatment | F(1, 53)=8.734, p<0.01   |

**Supplementary Table S3. Detailed statistical evaluation for Figure 2.**

Two-way repeated measures ANOVA for persistence of hyperalgesia following cessation from 20mg/kg chronic morphine

| WT vs KO                    | Heat                    |
|-----------------------------|-------------------------|
| Genotype                    | F(1, 45)=21.67, p<0.001 |
| Treatment                   | F(1, 45)=6.29, p<0.05   |
| Genotype x Treatment        | F(1, 45)=24.30, p<0.001 |
| Time                        | F(4, 180)=1.568, p=0.18 |
| Time x Genotype             | F(4, 180)=3.505, p<0.01 |
| Time x Treatment            | F(4, 180)=2.88, p<0.05  |
| Time x Genotype x Treatment | F(4, 180)=0.997, p=0.41 |



**Supplementary Table S4. Detailed statistical evaluation for Fig. 3.**

Two-way ANOVA repeated measures for analgesia and tolerance to analgesia in WT

| WT                        | Heat                     |
|---------------------------|--------------------------|
| Treatment                 | F(1,44)=18.20, p<0.001   |
| Gender                    | F(1,44)=2.04, p=0.16     |
| Treatment x Gender        | F(1,44)=0.675, p=0.41    |
| Time                      | F(2,88)=108.67, p<0.001  |
| Time x Gender             | F(2,88)=1.25, p=0.160.29 |
| Time x Treatment          | F(2,88)=5.186, p<0.01    |
| Time x Gender x Treatment | F(2,88)=0.99, p=0.37     |

| WT                        | Pressure                 |
|---------------------------|--------------------------|
| Treatment                 | F(1,33)=28.72, p<0.001   |
| Gender                    | F(1,33)=0.002, p=0.96    |
| Treatment x Gender        | F(1,33)=0.014, p=0.90    |
| Time                      | F(2,66)=118.702, p<0.001 |
| Time x Gender             | F(2,66)=0.163, p=0.84    |
| Time x Treatment          | F(2,66)=7.86, p<0.001    |
| Time x Gender x Treatment | F(2,66)=0.223, p=0.80    |

Three-way repeated measures ANOVA for hyperalgesia

| WT vs KO                             | Heat                     |
|--------------------------------------|--------------------------|
| Treatment                            | F(1, 81)=13.50, p<0.001  |
| Gender                               | F(1, 81)=1.10, p=0.29    |
| Genotype                             | F(1, 81)=86.100, p<0.001 |
| Treatment x Gender                   | F(1, 81)=0.08, p=0.77    |
| Genotype x Treatment                 | F(1, 81)=3.38, p=0.06    |
| Gender x Genotype                    | F(1, 81)=1.109, p=0.29   |
| Gender x Genotype x Treatment        | F(1, 81)=0.034, p=0.89   |
| Time                                 | F(1,81)=42.401, p<0.001  |
| Time x Gender                        | F(1,81)=0.038, p=0.84    |
| Time x Treatment                     | F(1,81)=2.169, p=0.14    |
| Time x Genotype                      | F(1,81)=17.321, p<0.001  |
| Time x Genotype x Treatment          | F(1,81)=3.510, p=0.06    |
| Time x Gender x Treatment            | F(1,81)=0.439, p=0.50    |
| Time x Genotype x Gender x Treatment | F(1,81)=0.479, p=0.49    |

| WT vs KO             | Pressure                 |
|----------------------|--------------------------|
| Treatment            | F(1, 66)=16.17, p<0.001  |
| Gender               | F(1, 66)=0.000, p=0.95   |
| Genotype             | F(1, 66)=139.98, p<0.001 |
| Treatment x Gender   | F(1, 66)=0.01, p=0.92    |
| Genotype x Treatment | F(1, 66)=13.34, p<0.001  |

|                                      |                          |
|--------------------------------------|--------------------------|
| Gender x Genotype                    | F(1, 66)=0.00, p=0.95    |
| Gender x Genotype x Treatment        | F(1, 66)=0.42, p=0.52    |
| Time                                 | F(2,132)=149.55, p<0.001 |
| Time x Gender                        | F(2,132)=0.46, p=0.63    |
| Time x Treatment                     | F(2,132)=3.29, p<0.05    |
| Time x Genotype                      | F(2,132)=160.37, p<0.001 |
| Time x Genotype x Treatment          | F(2,132)=2.12, p=0.12    |
| Time x Gender x Treatment            | F(2,132)=0.26, p=0.76    |
| Time x Genotype x Gender x Treatment | F(2,132)=1.14, p=0.32    |

|                                      |                        |
|--------------------------------------|------------------------|
| WT vs KO                             | Cold                   |
| Treatment                            | F(1, 49)=4.92, p<0.05  |
| Gender                               | F(1, 49)=0.08, p= 0.72 |
| Genotype                             | F(1, 49)=9.19, p<0.01  |
| Treatment x Gender                   | F(1, 49)=0.46, p= 0.49 |
| Genotype x Treatment                 | F(1, 49)=5.98, p<0.01  |
| Gender x Genotype                    | F(1, 49)=1.24, p= 0.27 |
| Gender x Genotype x Treatment        | F(1, 49)=1.38, p= 0.24 |
| Time                                 | F(1,49)=12.48, p<0.001 |
| Time x Gender                        | F(1,49)=0.49, p=0.48   |
| Time x Treatment                     | F(1,49)=12.81, p<0.001 |
| Time x Genotype                      | F(1,49)=16.89, p<0.001 |
| Time x Genotype x Treatment          | F(1,49)=8.18, p<0.01   |
| Time x Gender x Treatment            | F(1,49)=0.61, p=0.43   |
| Time x Genotype x Gender x Treatment | F(1,49)=1.01, p=0.32   |

**Supplementary Table S5. Detailed statistical evaluation for Fig. 4.**

Two-way repeated measures ANOVA for chronic morphine induced hyperalgesia in WT and KO mice under pSNL neuropathic injury.

| WT vs KO                    | Cold                    |
|-----------------------------|-------------------------|
| Genotype                    | F(1, 39)=11.25, p<0.01  |
| Treatment                   | F(1, 39)=5.47, p<0.05   |
| Genotype x Treatment        | F(1, 39)=9.09, p<0.01   |
| Time                        | F(2,78)=34.814, p<0.001 |
| Time x Genotype             | F(2,78)=9.283, p<0.001  |
| Time x Treatment            | F(2,78)=1.886, p=0.15   |
| Time x Genotype x Treatment | F(2,78)=6.816, p<0.05   |

| WT vs KO                    | Heat                    |
|-----------------------------|-------------------------|
| Genotype                    | F(1, 38)=0.19, p=0.66   |
| Treatment                   | F(1, 38)=0.47, p=0.49   |
| Genotype x Treatment        | F(1, 38)=0.12, p=0.72   |
| Time                        | F(2,76)=78.766, p<0.001 |
| Time x Genotype             | F(2,76)=0.191, p=0.82   |
| Time x Treatment            | F(2,76)=0.386, p=0.68   |
| Time x Genotype x Treatment | F(2,76)=1.654, p=0.19   |

| WT vs KO                    | Mechanical              |
|-----------------------------|-------------------------|
| Genotype                    | F(1, 39)=0.53, p=0.46   |
| Treatment                   | F(1, 39)=4.43, p<0.05   |
| Genotype x Treatment        | F(1, 39)=0.01, p=0.92   |
| Time                        | F(2,78)=51.542, p<0.001 |
| Time x Genotype             | F(2,78)=0.167, p=0.84   |
| Time x Treatment            | F(2,78)=0.236, p=0.79   |
| Time x Genotype x Treatment | F(2,78)=0.821, p=0.44   |

**Supplementary Table S6. Detailed statistical evaluation for Fig. 5.**

One-way ANOVA repeated measures for M3G-induced hyperalgesia.

| WT               | Heat                   |
|------------------|------------------------|
| Treatment        | F(1, 18)=11.90, p<0.01 |
| Time             | F(3,54)=1.435, p=0.24  |
| Time x Treatment | F(3.54)=6.582, p<0.001 |

| WT               | Mechanical              |
|------------------|-------------------------|
| Treatment        | F(1, 18)=16.76, p<0.001 |
| Time             | F(3,54)=0.912, p=0.44   |
| Time x Treatment | F(3.54)=4.389, p<0.01   |

| KO               | Heat                  |
|------------------|-----------------------|
| Treatment        | F(1, 17)=2.01, p=0.17 |
| Time             | F(3,51)=0.320, p=0.81 |
| Time x Treatment | F(3.51)=0.486, p=0.69 |

| KO               | Mechanical             |
|------------------|------------------------|
| Treatment        | F(1, 17)=0.341, p=0.56 |
| Time             | F(3,51)=0.059, p=0.98  |
| Time x Treatment | F(3.51)=0.100, p=0.95  |

| Flox             | Mechanical             |
|------------------|------------------------|
| Treatment        | F(1, 12)=0.678, p=0.42 |
| Time             | F(3,36)=2.455, p=0.07  |
| Time x Treatment | F(3.36)=2.638, p=0.06  |

| Flox             | Heat                   |
|------------------|------------------------|
| Treatment        | F(1, 11)=1.447, p=0.25 |
| Time             | F(3,33)=2.138, p=0.11  |
| Time x Treatment | F(3.33)=1.785, p=0.16  |

|                  |                         |
|------------------|-------------------------|
| cKO              | Mechanical              |
| Treatment        | F(1, 14)=13.016, p<0.01 |
| Time             | F(3,42)=2.110, p=0.11   |
| Time x Treatment | F(3.42)=3.325, p<0.05   |

|                  |                        |
|------------------|------------------------|
| cKO              | Heat                   |
| Treatment        | F(1, 14)=3.849, p=0.06 |
| Time             | F(3,42)=2.055, p=0.12  |
| Time x Treatment | F(3.42)=5.196, p<0.05  |

**Supplementary Table S7. Detailed statistical evaluation for Supplementary Fig. S2.**

One-way ANOVA repeated measures in WT or KO for analgesia and tolerance to analgesia

| WT               | Heat                    |
|------------------|-------------------------|
| Treatment        | F(1,18)=0.379, p=0.54   |
| Time             | F(2,36)=36.394, p<0.001 |
| Time x Treatment | F(2,36)= 15.04, p<0.001 |

| KO               | Heat                  |
|------------------|-----------------------|
| Treatment        | F(1,7)=0.34, p=0.57   |
| Time             | F(2,14)=2.057, p=0.12 |
| Time x Treatment | F(2,14)= 1.99, p=0.15 |

Two-way repeated measures ANOVA for hyperalgesia

| WT vs KO                    | Heat                    |
|-----------------------------|-------------------------|
| Genotype                    | F(1, 33)=0.059, p=0.81  |
| Treatment                   | F(1, 33)=4.84, p<0.05   |
| Genotype x Treatment        | F(1, 33)=2.63, p=0.11   |
| Time                        | F(1,33)=15.068, p<0.001 |
| Time x Genotype             | F(1,33)=5.897, p<0.05   |
| Time x Treatment            | F(1,33)=4.119, p=0.051  |
| Time x Genotype x Treatment | F(1,33)=19.825, p<0.001 |

| WT vs KO                    | Cold                   |
|-----------------------------|------------------------|
| Genotype                    | F(1, 33)=5.21, p<0.05  |
| Treatment                   | F(1, 33)=1.16, p=0.28  |
| Genotype x Treatment        | F(1, 33)=3.83, p<0.05  |
| Time                        | F(1,33)=3.059, p=0.08  |
| Time x Genotype             | F(1,33)=2.080, p=0.15  |
| Time x Treatment            | F(1,33)=1.289, p=0.051 |
| Time x Genotype x Treatment | F(1,33)=19.825, p<0.01 |

**Supplementary table S8. Detailed statistical evaluation for Supplementary Fig. S3.**

ANOVA repeated measures for TLR4 mRNA expression in KO and WT mice

| WT vs KO             | TLR4                  |
|----------------------|-----------------------|
| Genotype             | F(1, 45)=0.15, p=0.69 |
| Treatment            | F(1, 45)=2.89, p=0.09 |
| Genotype x Treatment | F(1, 45)=0.02, p=0.88 |

One way ANOVA for MOR mRNA expression in WT mice

| WT morphine vs WT saline | MOR                  |
|--------------------------|----------------------|
| Treatment                | F(1, 8)=0.39, p=0.54 |
